# Supplementary material for: The Effectiveness of a Novel Air-Barrier Device for Aerosol Reduction in a Dental Environment: Computational Fluid Dynamics Simulation
Source: MDPI journal article supplement (doi:10.3390/bioengineering10080947), 2023-08-08
Supplement: s1 [file s1]

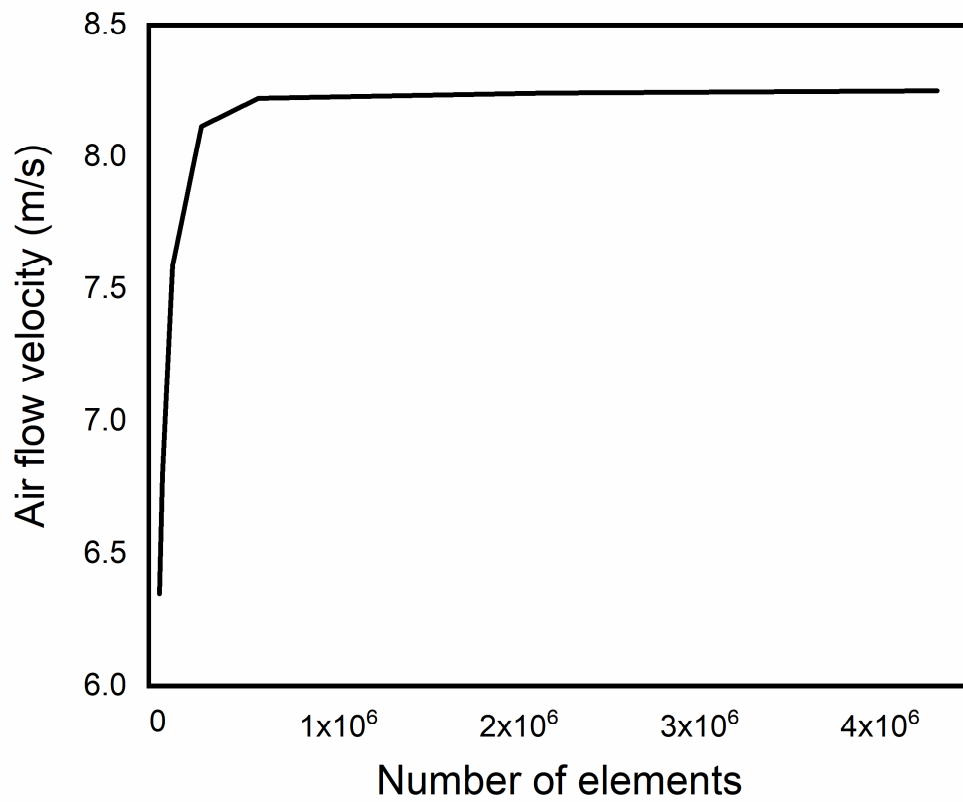

**Figure S1.** The convergence and mesh independence of study of COMSOL simulation.

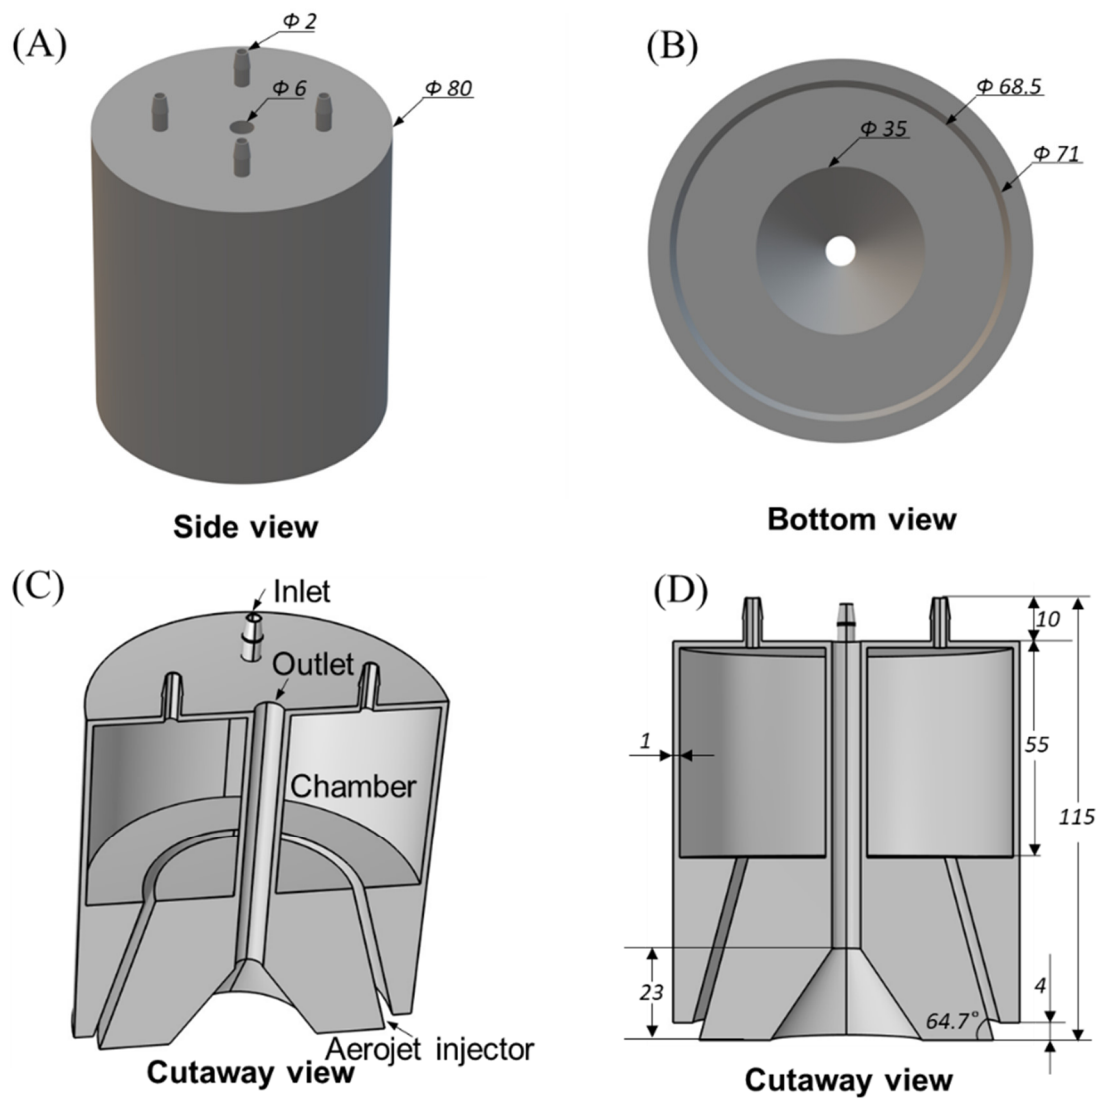

**Figure S2.** The detailed design and dimensions of the proposed device in COMSOL simulation.

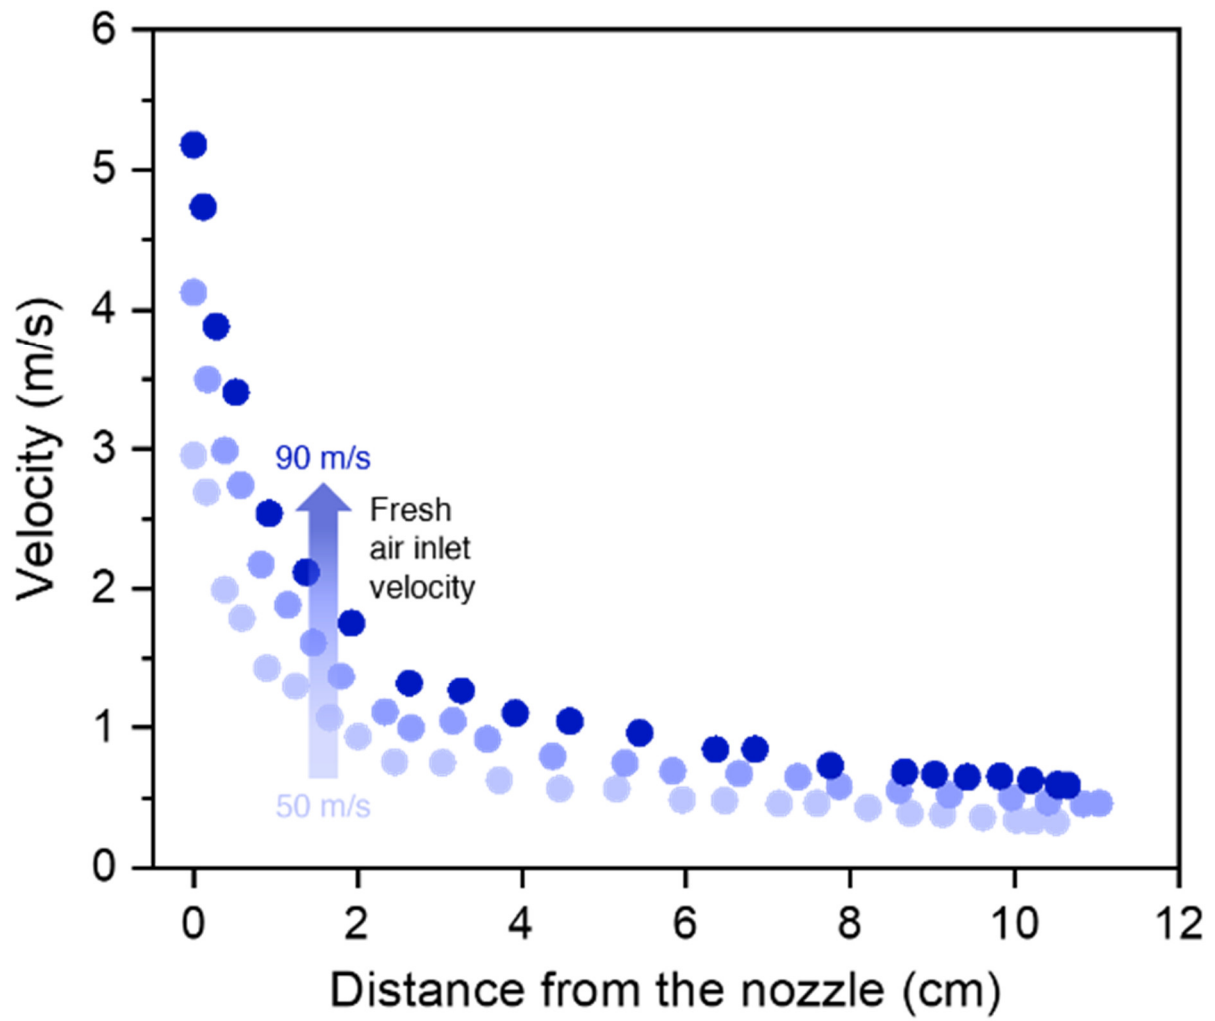

**Figure S3.** Velocity profiles of the air barrier at varied fresh-air inlet velocities (no ventilation applied).

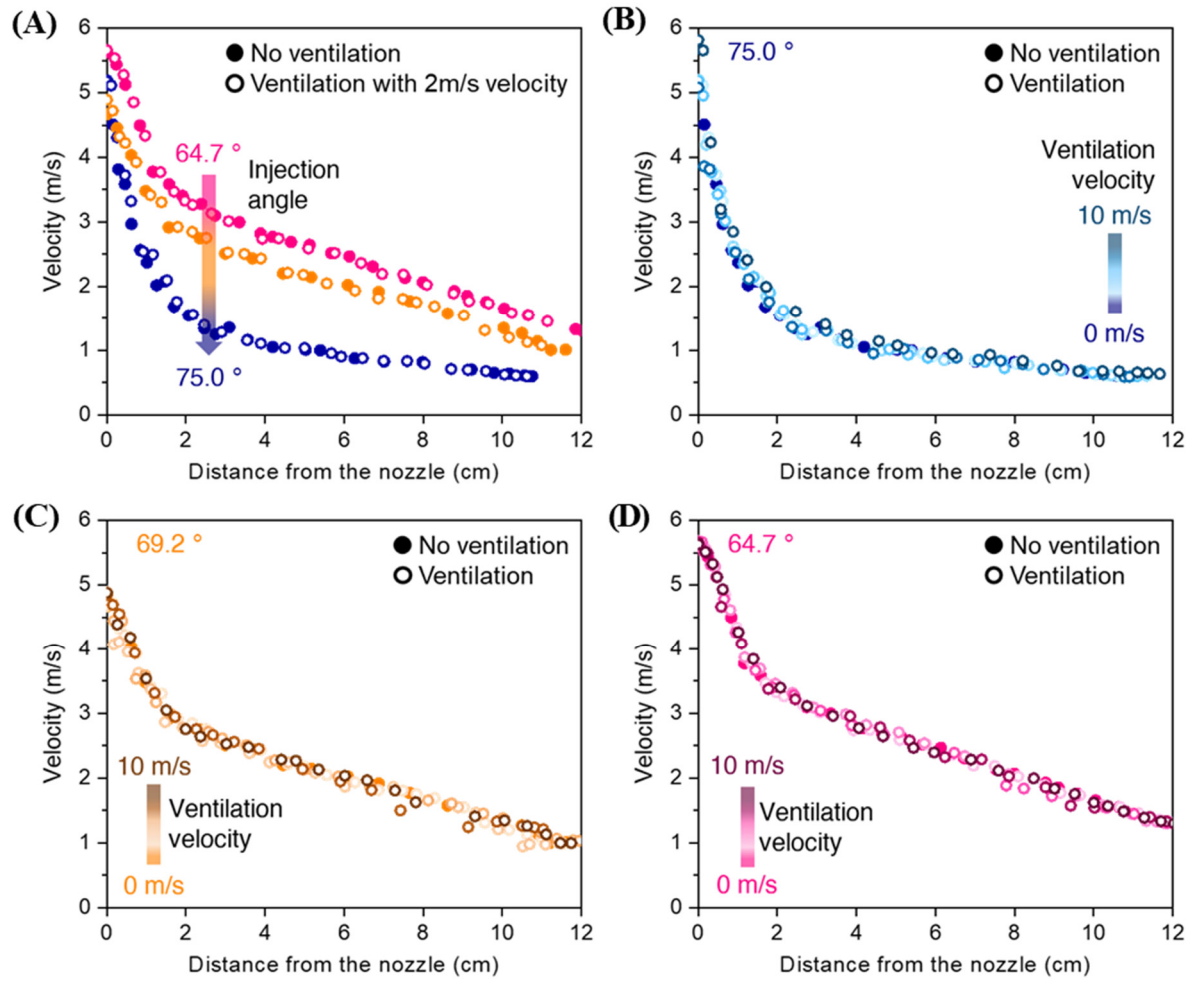

**Figure S4.** (A) The velocity of the air barrier as a function of distance from the nozzle with and without ventilation of 2 m/s. Velocity profiles of the air barrier with different ventilation velocities (0, 2, 4, 6, 8, 10 m/s) at (B) 75°, (C) 69.2°, and (D) 64.7°.

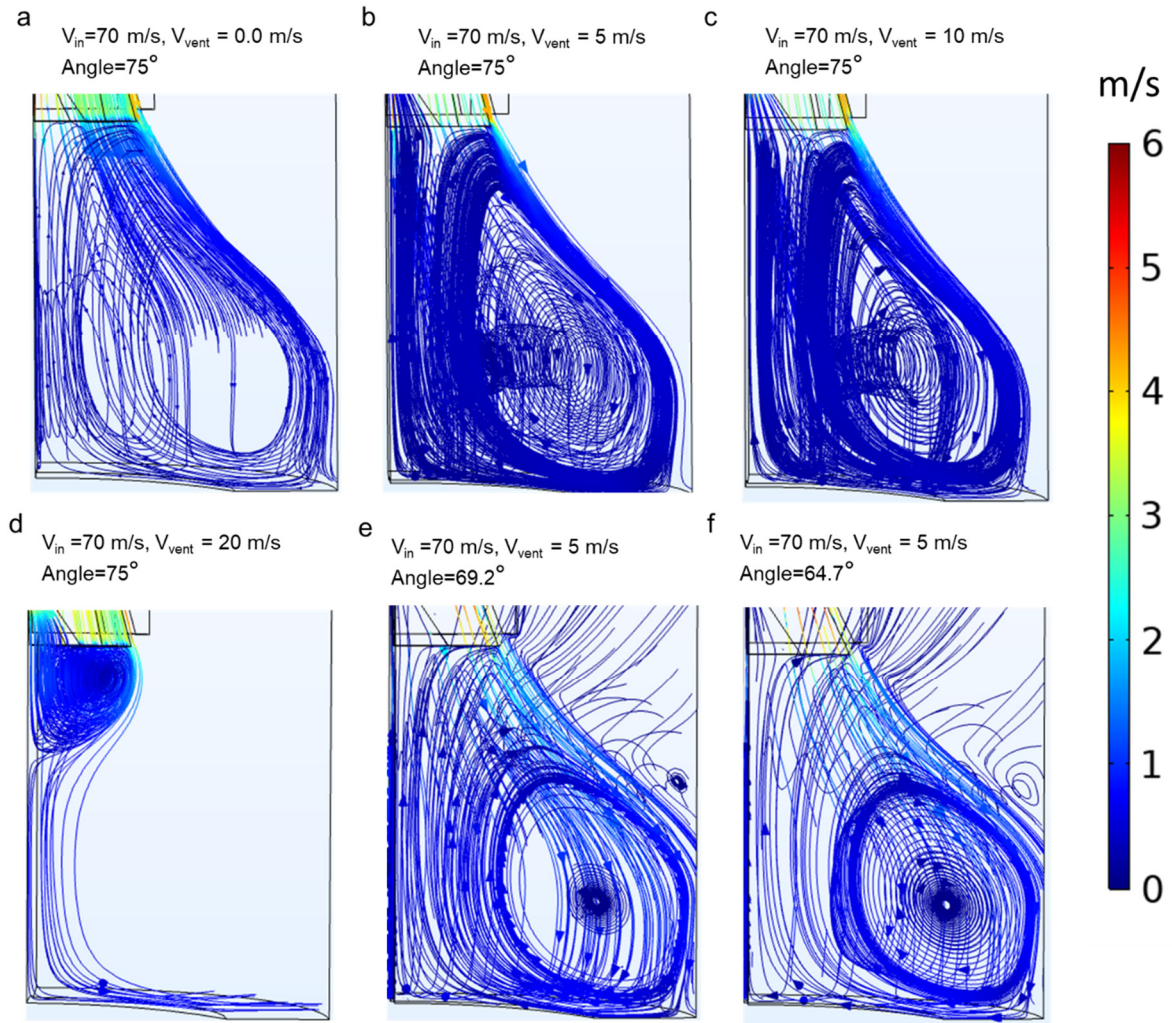

**Figure S5.** The streamline in the patient zone in the presence of the air barrier with varied ventilation velocities of (A) 0 m/s, (B) 5 m/s, (C) 10 m/s, and (D) 20 m/s and different injection angles of (E)  $69.2^\circ$ , (F)  $64.7^\circ$ .

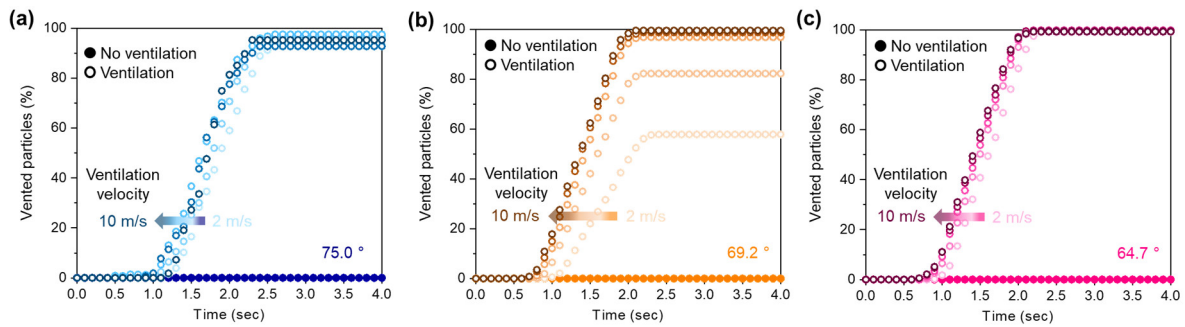

**Figure S6.** Vented particles (%) with different ventilation velocities (0, 2, 4, 6, 8, 10 m/s) at (A)  $75^\circ$ , (B)  $69.2^\circ$ , and (C)  $64.7^\circ$ .

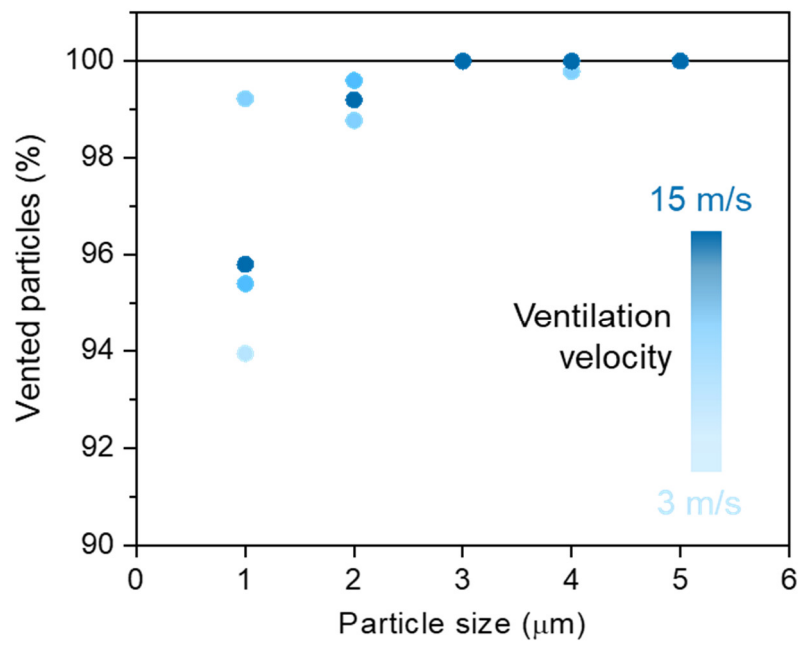

**Figure S7.** The vented particles (%) of microparticles in the range of 1  $\mu\text{m}$  to 5  $\mu\text{m}$  at different ventilation velocities (3, 7, 11, 15 m/s).

**Table S1.** The contaminant removal effectiveness at varied injection angles, injection velocities, and ventilation velocities.

| Injection angle<br>(°) | Injection<br>velocity (m s <sup>-1</sup> ) | Ventilation<br>velocity (m s <sup>-1</sup> ) | CRE   |
|------------------------|--------------------------------------------|----------------------------------------------|-------|
| 75.0                   | 3.1                                        | 5                                            | 464   |
| 75.0                   | 3.6                                        |                                              | 1569  |
| 75.0                   | 4.1                                        |                                              | 766   |
| 75.0                   | 5.1                                        |                                              | 4819  |
| 64.7                   | 5.1                                        | 6                                            | 1310  |
| 69.2                   |                                            |                                              | 1000  |
| 75.0                   |                                            |                                              | 16300 |
